# Supplementary material for: Environmental Conditions Modulate the Protein Content and Immunomodulatory Activity of Extracellular Vesicles Produced by the Probiotic Propionibacterium freudenreichii
Source: PubMed Central journal article supplement (PMC7851693; doi:10.1128/aem.02263-20), 2021-01-29
Supplement: AEM.02263-20-s0001.pdf [file AEM.02263-20-s0001.pdf]

# Supplementary Material

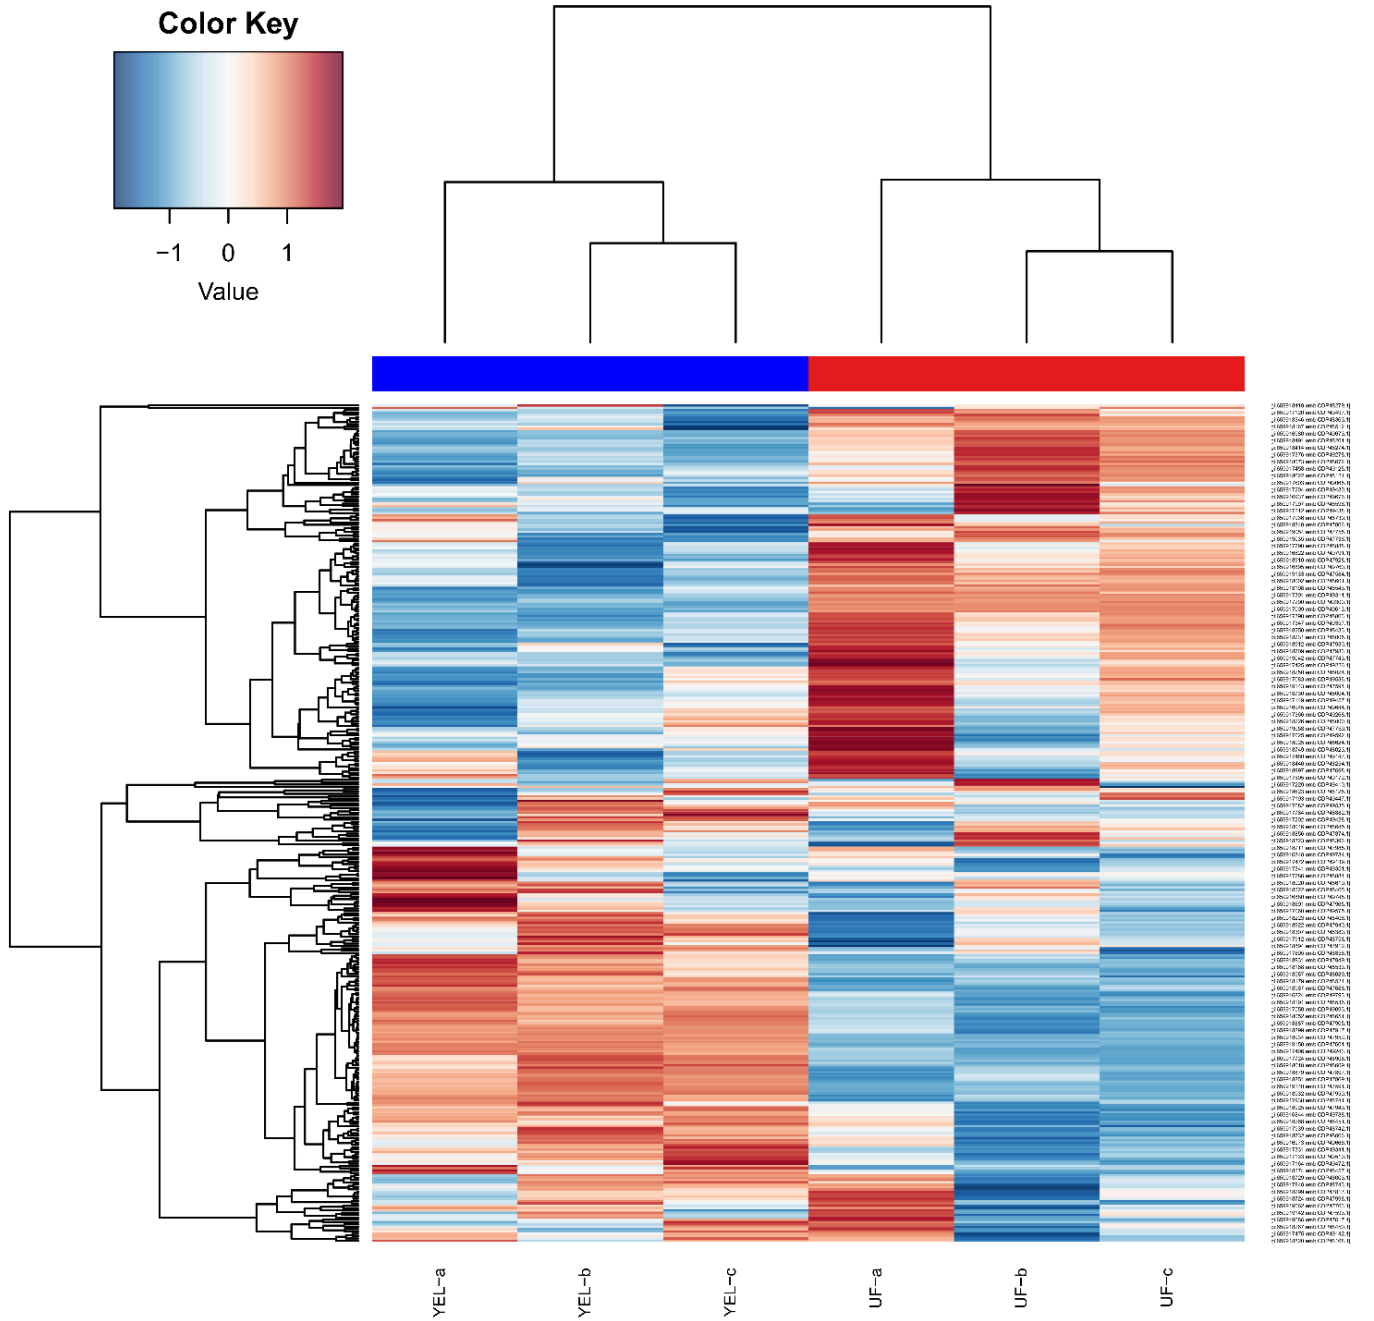

**Figure S1.** Heatmap representing variations in the relative abundance of identified proteins in biological replicates of YEL and UF-derived EVs.
